# Supplementary material for: Characterization of Sn4P3–Carbon Composite Films for Lithium-Ion Battery Anode Fabricated by Aerosol Deposition
Source: MDPI journal article supplement (doi:10.3390/nano9071032), 2019-07-19
Supplement: s1 [file s1]

# Characterization of $\text{Sn}_4\text{P}_3$ -Carbon Composite Films for Lithium-Ion Battery Anode Fabricated by Aerosol Deposition

Toki Moritaka <sup>1</sup>, Yuh Yamashita <sup>1</sup>, Tomohiro Tojo <sup>2</sup>, Ryoji Inada <sup>1,\*</sup> and Yoji Sakurai <sup>1</sup>

<sup>1</sup> Department of Electrical and Electronic Information Engineering, Toyohashi University of Technology, 1-1 Tempaku-cho, Toyohashi, Aichi 4418580, Japan

<sup>2</sup> Department of Electrical and Electronic Engineering, Shizuoka Institute of Science and Technology, 2200-2 Toyosawa, Fukuroi, Shizuoka 437-8555, Japan

\* Correspondence: inada@ee.tut.ac.jp; Tel.: +81-532-446723

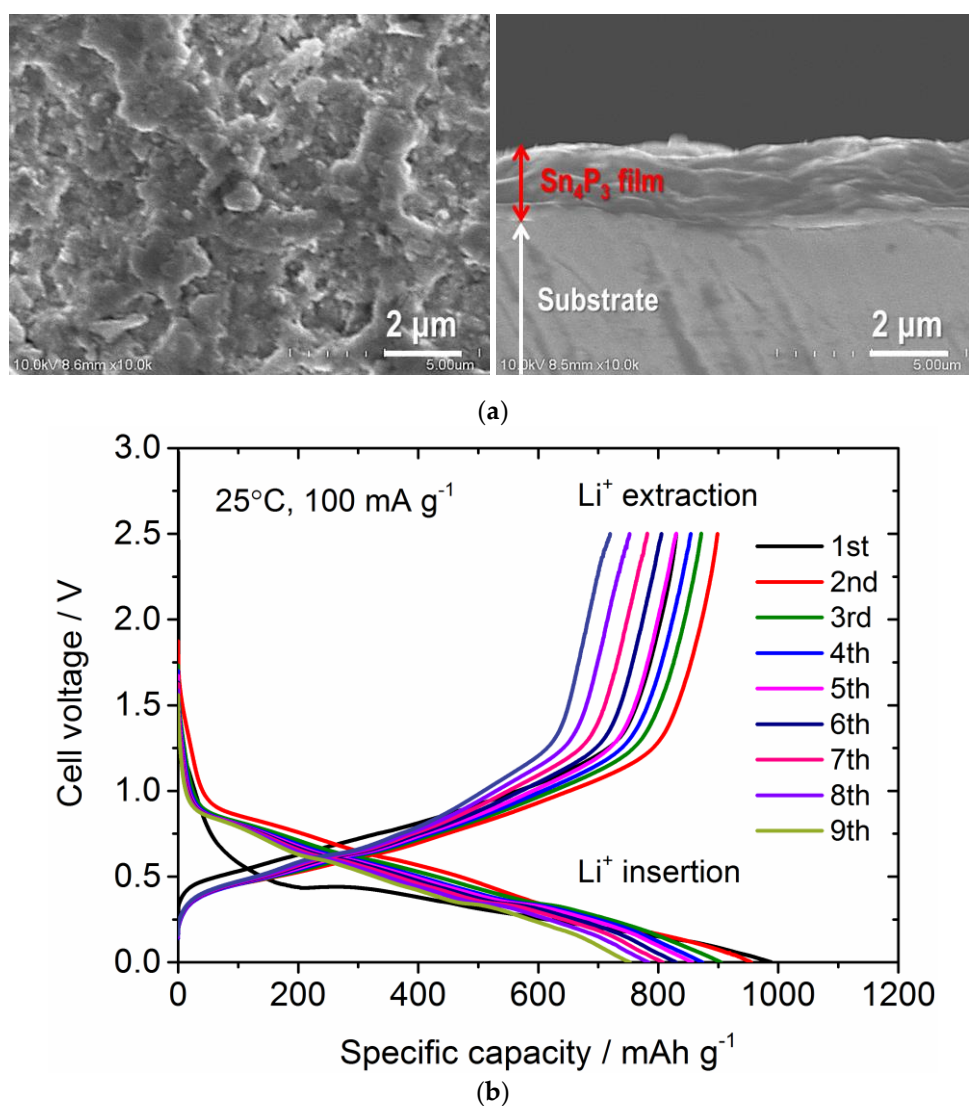

**Figure S1.** (a) SEM image of broader surface (left) and transverse cross section (right) of the  $\text{Sn}_4\text{P}_3$  film fabricated by AD and (b) Galvanostatic charge and discharge curves for the  $\text{Sn}_4\text{P}_3$  film.

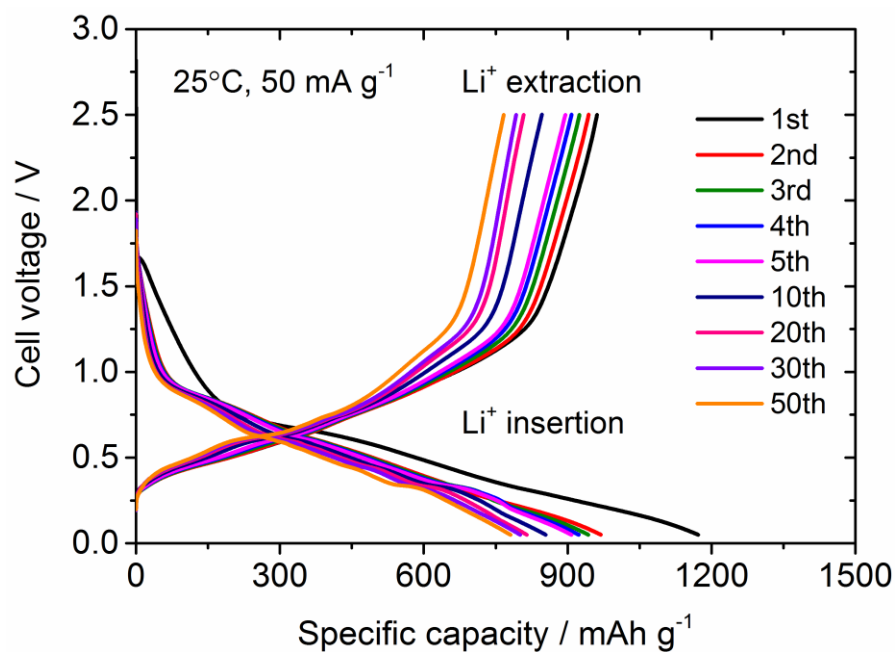

(a)

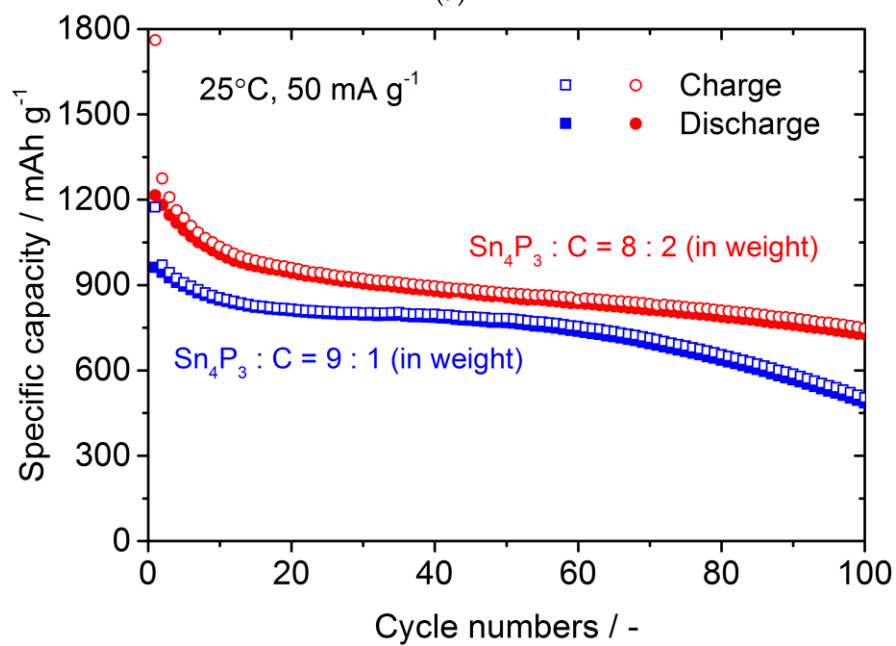

(b)

**Figure S2.** (a) Galvanostatic charge and discharge curves for the  $\text{Sn}_4\text{P}_3/\text{C}$  composite film ( $\text{Sn}_4\text{P}_3:\text{AB} = 9:1$  in weight) and (b) Comparison of cycling stability for  $\text{Sn}_4\text{P}_3/\text{C}$  composite films with different carbon content.
